# Supplementary material for: Tumor-associated antigen PRAME exhibits dualistic functions that are targetable in diffuse large B cell lymphoma
Source: PubMed Central journal article supplement (PMC9106353; doi:10.1172/jci145343), 2022-05-16
Supplement: jci-132-145343-s090.pdf [file jci-132-145343-s090.pdf]

## Supplementary Materials

### **The tumor associated antigen PRAME exhibits dualistic functions that are targetable in diffuse large B cell lymphoma**

Katsuyoshi Takata<sup>1,2</sup>, Lauren C. Chong<sup>1</sup>, Daisuke Ennishi<sup>1</sup>, Tomohiro Aoki<sup>1</sup>, Michael Yu Li<sup>1</sup>, Avinash Thakur<sup>3,4</sup>, Shannon Healy<sup>1</sup>, Elena Viganò<sup>1</sup>, Tao Dao<sup>5</sup>, Daniel Kwon<sup>6</sup>, Gerben Duns<sup>1</sup>, Julie S. Nielsen<sup>7</sup>, Susana Ben-Neriah<sup>1</sup>, Ethan Tse<sup>1</sup>, Stacy Hung<sup>1</sup>, Merrill Boyle<sup>1</sup>, Sung Soo Mun<sup>5</sup>, Christopher Bourne<sup>5</sup>, Bruce Woolcock<sup>1</sup>, Adèle Telenius<sup>1</sup>, Makoto Kishida<sup>1</sup>, Shinya Rai<sup>1</sup>, Allen Zhang<sup>8</sup>, Ali Bashashati<sup>8</sup>, Saeed Saberi<sup>8</sup>, Gianluca D'Antonio<sup>7</sup>, Brad H. Nelson<sup>7</sup>, Sohrab P. Shah<sup>8,9</sup>, Pamela A. Hoodless<sup>3,4</sup>, Ari M. Melnick<sup>10</sup>, Randy D. Gascoyne<sup>1</sup>, Joseph M. Connors<sup>1</sup>, David A. Scheinberg<sup>5</sup>, Wendy Béguelin<sup>10</sup>, David W. Scott<sup>1</sup>, Christian Steidl<sup>1,11\*</sup>

Correspondence to: [CSteidl@bccancer.bc.ca](mailto:CSteidl@bccancer.bc.ca)

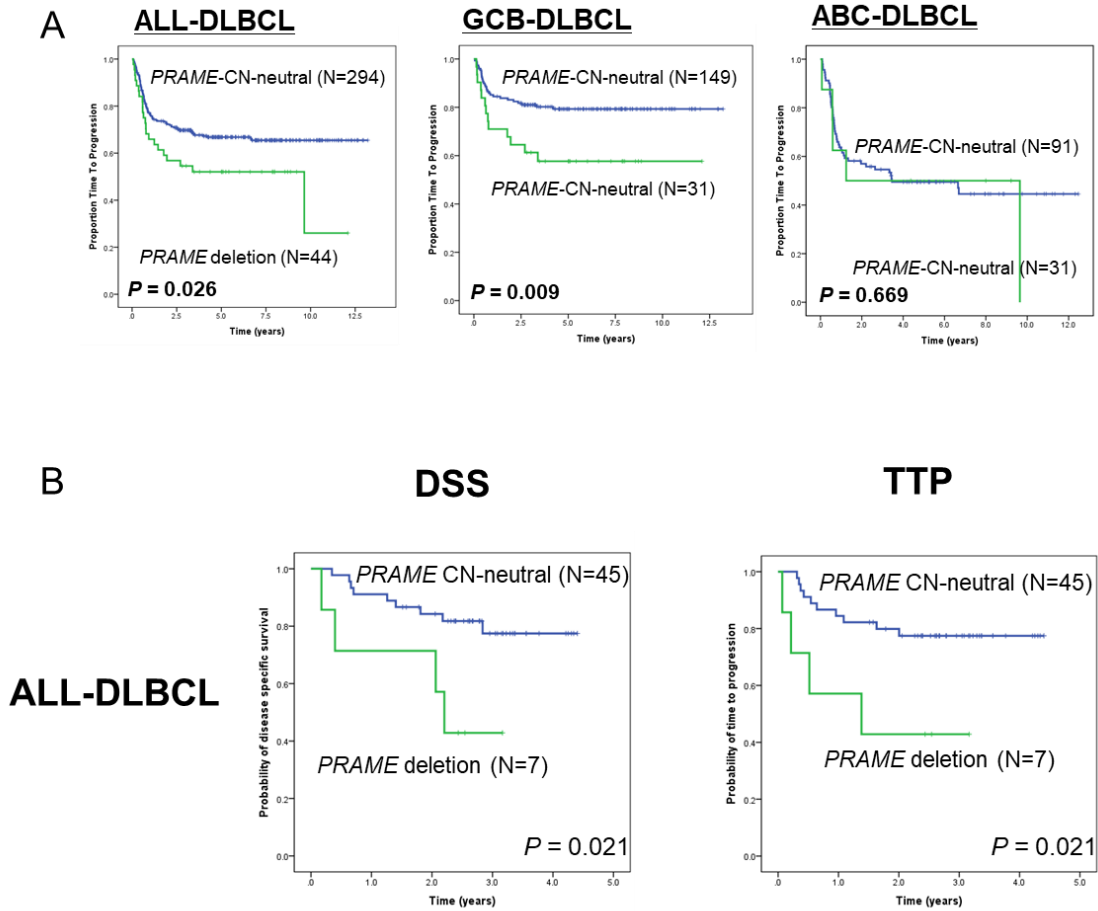

**Figure.S1. Kaplan-Meier analysis of discovery cohort and validation cohort. (A)** Time to Progression (TTP) survival in all- (left), GCB- (middle), and ABC-DLBCL (right). (B) Disease specific survival (DSS) and TTP in all-DLBCL in an independent DLBCL cohort (n=52).

A

**ALL-DLBCL**

**DSS**

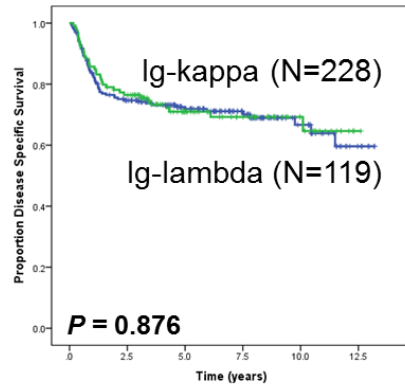

**TTP**

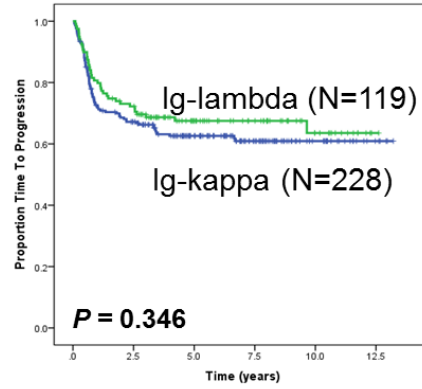

**GCB-DLBCL**

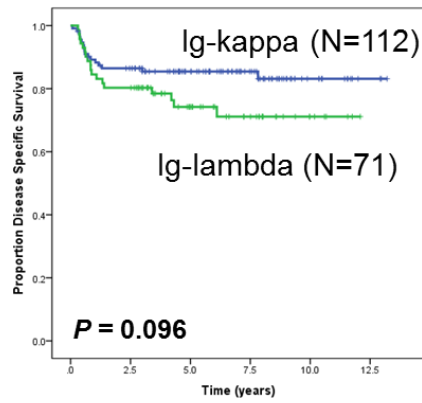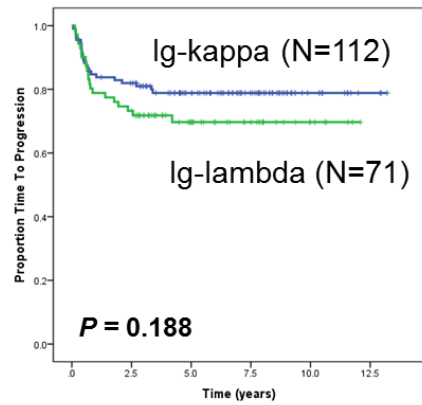

**B**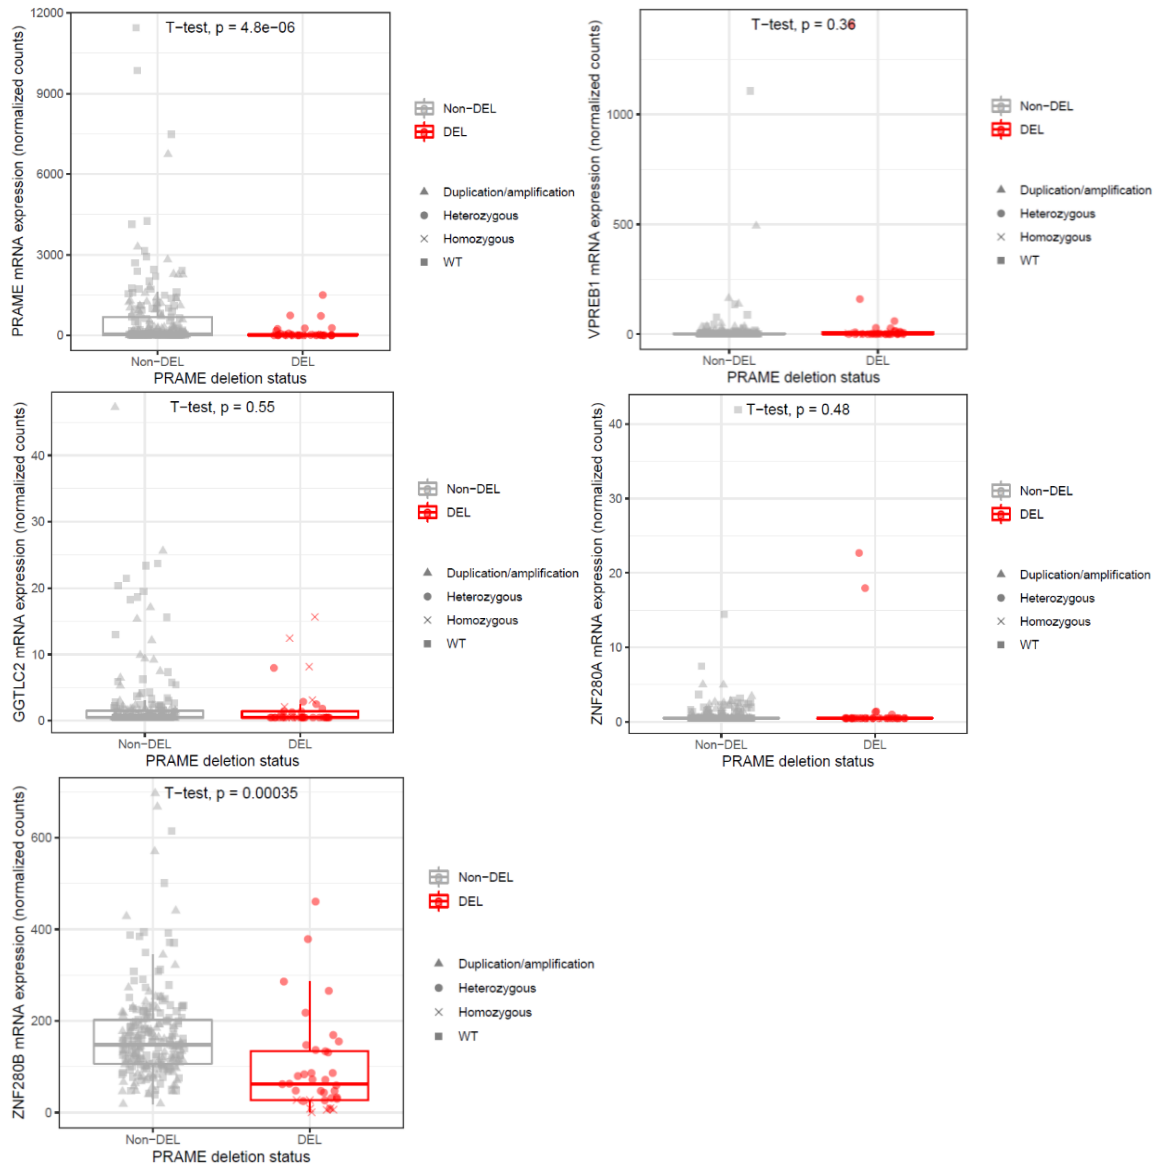

C

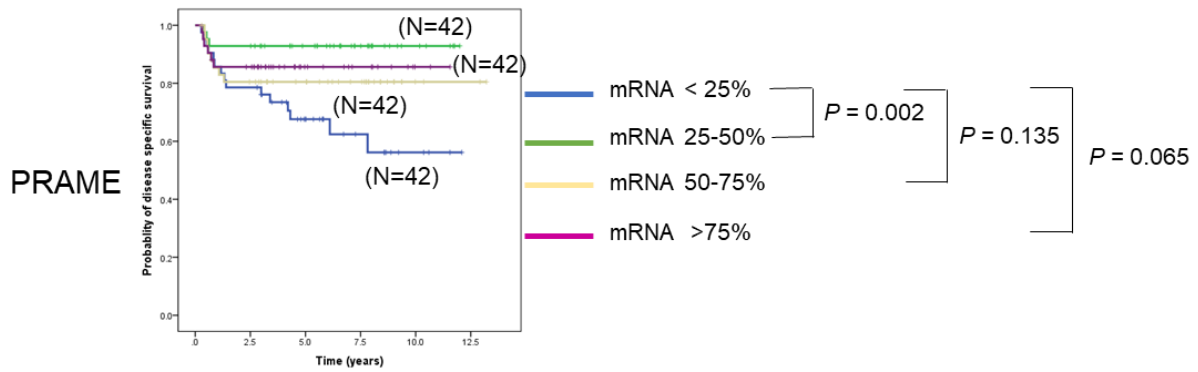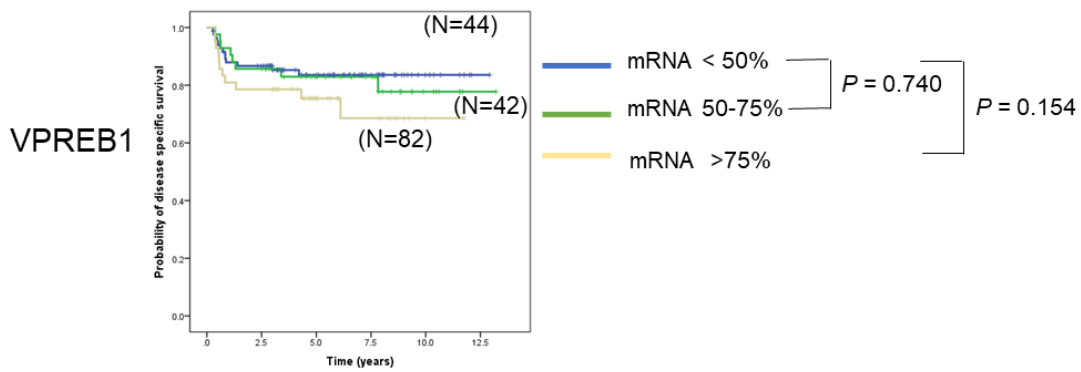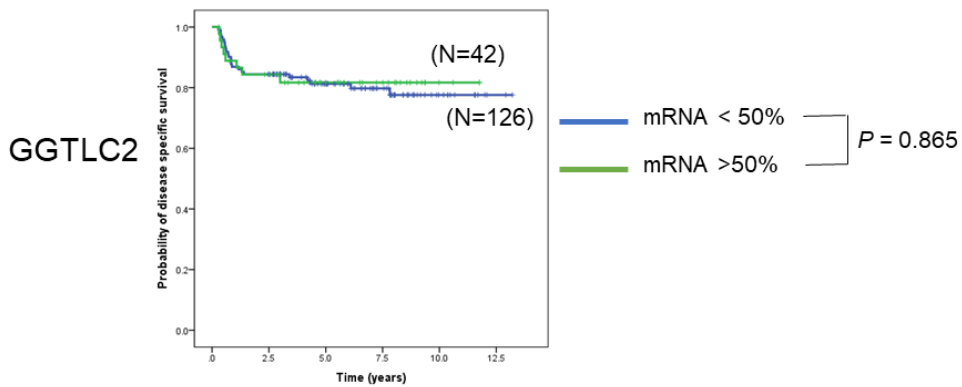

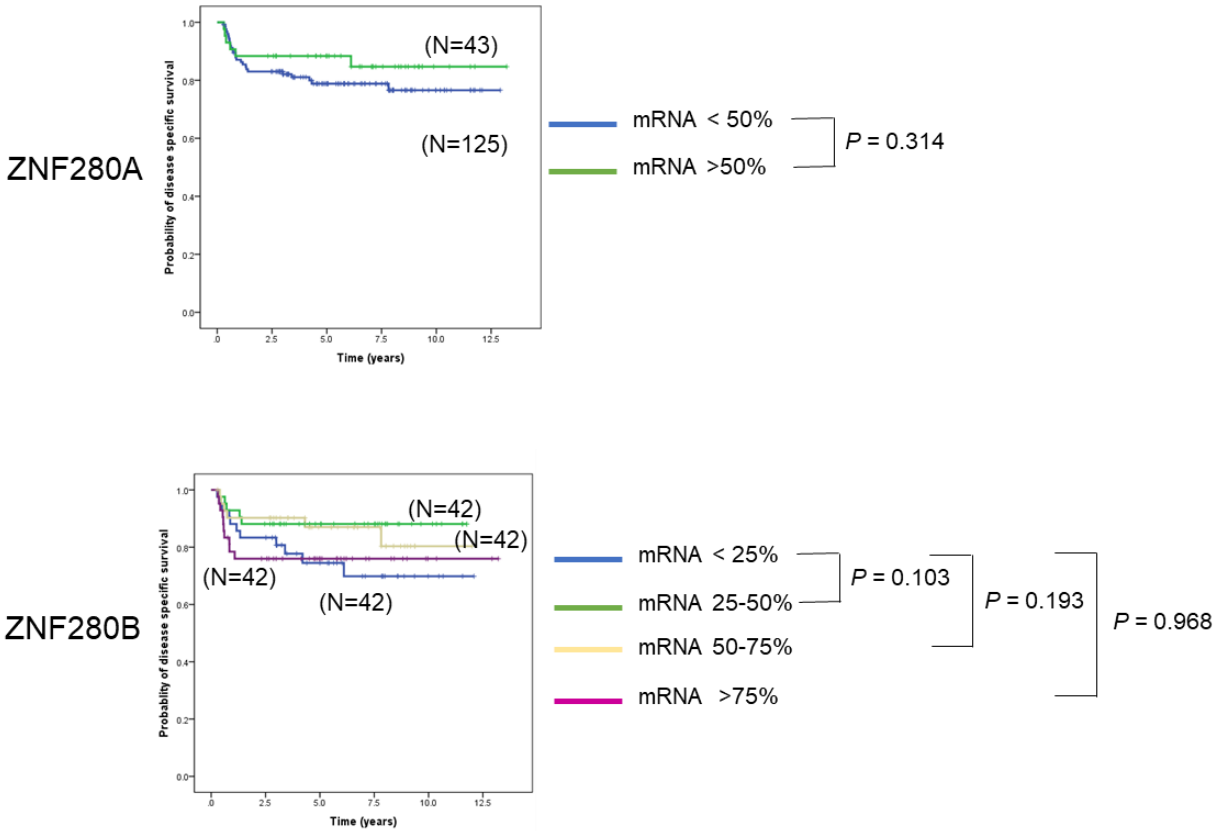

**Figure. S2. Correlation analysis for the Ig-lambda and 5 genes involved in 22q11.22 deletion area.**

(A) Kaplan-Meier curves represent DSS and TTP survival according to Ig-rearrangement status in all- (upper) and GCB-DLBCL (lower). (B) Cis-correlation analysis of mRNA for 5 genes (*PRAME*, *GGTCL2*, *VPREB1*, *ZNF280A*, *ZNF280B*) with *PRAME* deletion status. (C) Outcome correlation analysis using unbiased quartile mRNA cut-offs (25%, 50%, and 75%). Less than 25% of mRNA were included into <50% in *VPREB1*, *GGTCL2*, and *ZNF280A* because samples in the <25% and <50% quartiles showed same expression value.

A

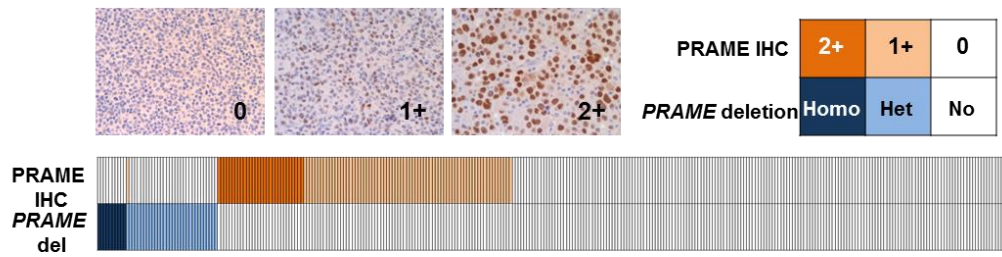

B

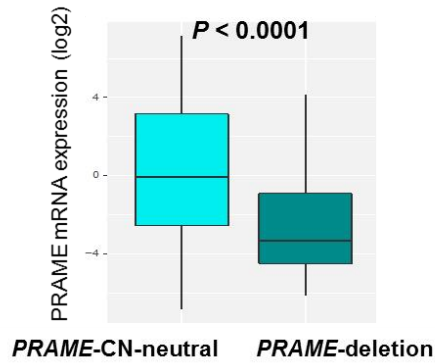

**Figure.S3. Correlation with Ig-kappa, -lambda, immunohistochemistry, and mRNA.** (A) Representative immunohistochemistry of PRAME and correlation with *PRAME* genetic status. (B) Correlation between *PRAME* deletion status and PRAME mRNA expression.

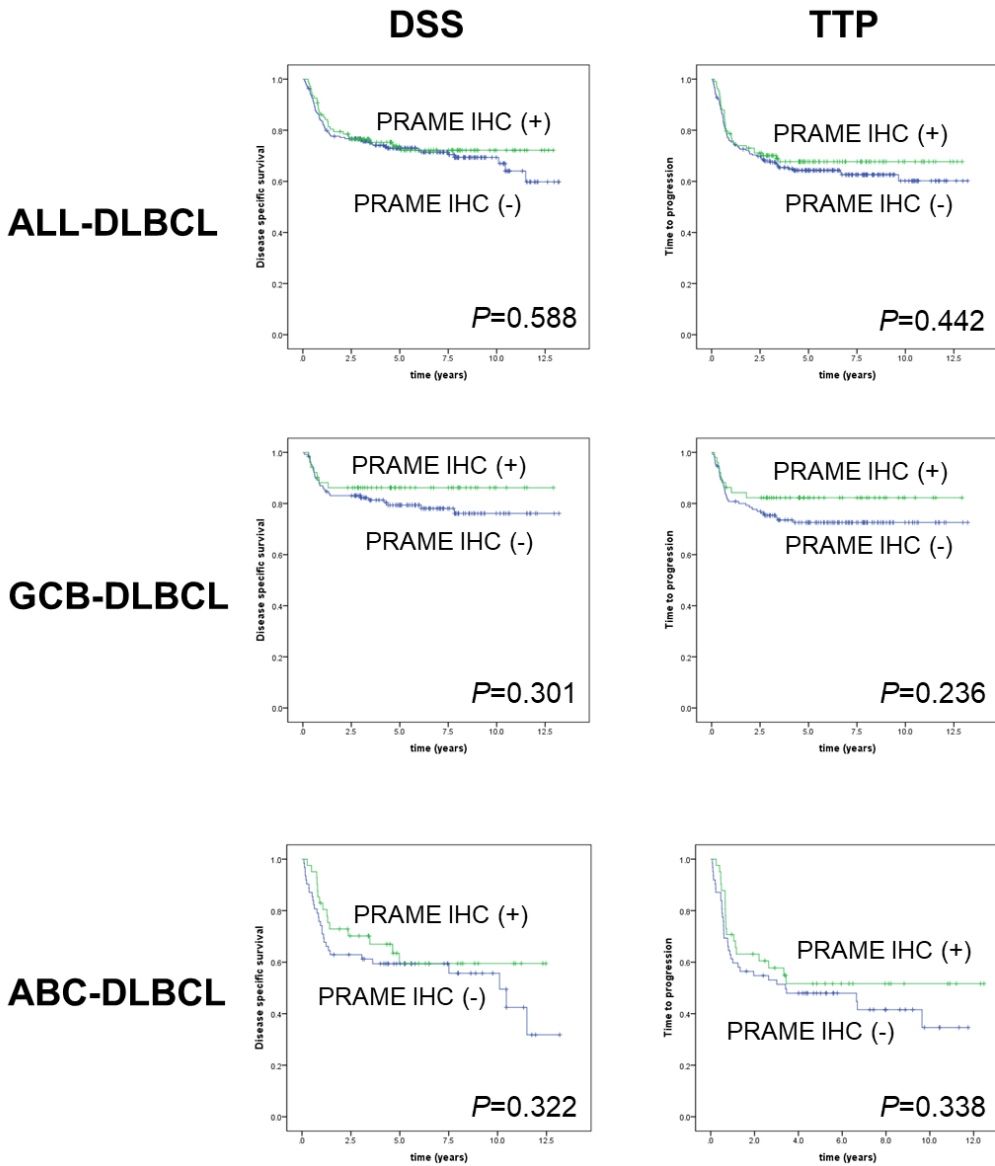

**Figure.S4. Outcome correlation with PRAME IHC status.**

Kaplan-Meier curves represent DSS and TTP survival according to PRAME IHC status in all- (upper), GCB- (middle), and ABC-DLBCL (lower).



A

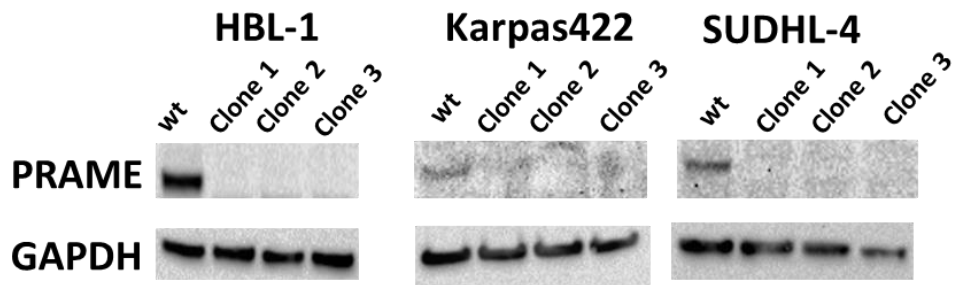

B

| Cell line and clone | Sequence                                                                           | Description      |
|---------------------|------------------------------------------------------------------------------------|------------------|
| HBL-1 clone 1       | TGTGgacaagcccacggagacttgGAGC                                                       | 22bp frameshift  |
|                     | CCCtctgtgtgctagcac agtgactttggccctaagttggtccct                                     | 177bp frameshift |
|                     | cagaagggtaggaaaagatagagttgcttatgcttgggctgaaag                                      |                  |
|                     | ggatgcctgttcctgtatgttctcagggttcattcagagccgatacat                                   |                  |
|                     | cagcatgagtgtgtggacaagcccacggagacttg<br>tggagctggcagggcagagcCTGCT                   |                  |
| HBL-1 clone 2       | AAGtctccgtggGCTTGT                                                                 | 9bp frameshift   |
|                     | AGCTcacaagtctccgtgggcttgcCACACA                                                    | 22bp frameshift  |
| HBL-1 clone 3       | GTCTCcgtagggcTTGTCC                                                                | 7bp frameshift   |
|                     | GCAGGctctgcccctgccagctccacaagtctccgt                                               | 238bp frameshift |
|                     | gggctgtccacacactcatgctgatgtatcggctctgaatggaaccctg                                  |                  |
|                     | aggaaacatacagggaaacaaggcatcccttcagcccagcataagcaac                                  |                  |
|                     | tctatcttttctcaccctctgagggaccaacttagggccaaagtcact<br>tgctagcaacagcaggggagttctAGTTTA |                  |
| Karpas-422 clone 1  | CCAgctccacaagtctccgtggGCTTGTCC                                                     | 19bp frameshift  |
|                     | CCAGCTCCAC AAGTctccGTGGGCT                                                         | 4bp frameshift   |
| Karpas-422 clone 2  | CAAgctccGTGGGCTTGTCC                                                               | 6bp frame shift  |
|                     | CAAgctccGTGGGCTTGTCC                                                               | 6bp frame shift  |
| Karpas422 clone 3   | CCAgctccacaagtctccgtggGCTTGTCC                                                     | 19bp frameshift  |
|                     | CCAgctccacaagtctccgtggGCTTGTCC                                                     | 19bp frameshift  |
| SU-DHL-4 clone 1    | AAGTctccgtgggcttgtccacacactcatgctgatgtatcggctctg                                   | 113bp frameshift |
|                     | aatggaaccctgaggaaacatacagggaaacaaggcatccctt                                        |                  |
|                     | cagccaagcataagcaCTCT<br>TGCcagctccacaagtctccgtgggcttgcCACA                         | 28bp frameshift  |
| SU-DHL-4 clone 2    | TGCcagctccacaagtctccgtgggcttgcCACA                                                 | 28bp frameshift  |
|                     | TGCcagctccacaagtctccgtgggcttgcCACA                                                 | 28bp frameshift  |
| SU-DHL-4 clone 3    | AGAGggaggcaggtgaagGGCC                                                             | 14bp frameshift  |
|                     | AACTTA <sub>g</sub> GGCCAA                                                         | 1bp frameshift   |

**Figure S5. Western Blotting and Sanger sequencing results for PRAME isogenic knockout clones in DLBCL cell lines. (A) Western Blotting of PRAME and GAPDH. Protein lysate (for anti-PRAME: 20µg, for anti-GAPDH: 5µg) was loaded in the separate gels and transferred to separate membranes. (B) Summary of Sanger sequencing for PRAME exon 4 region.**

A

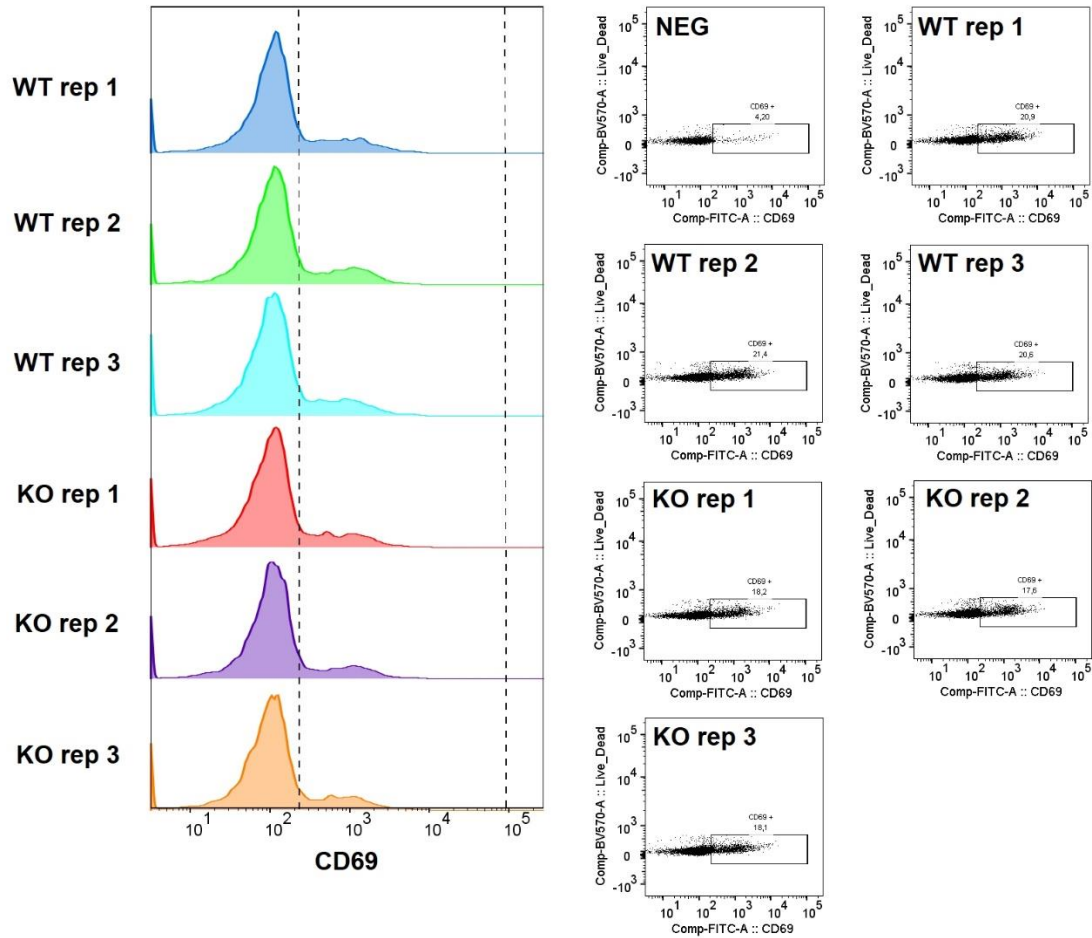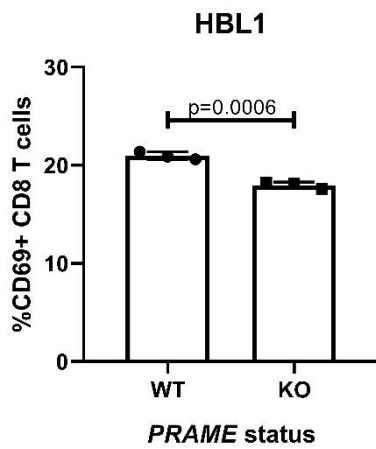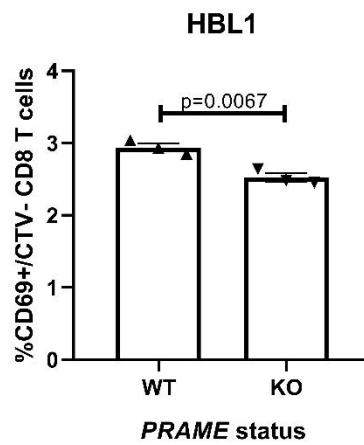

B

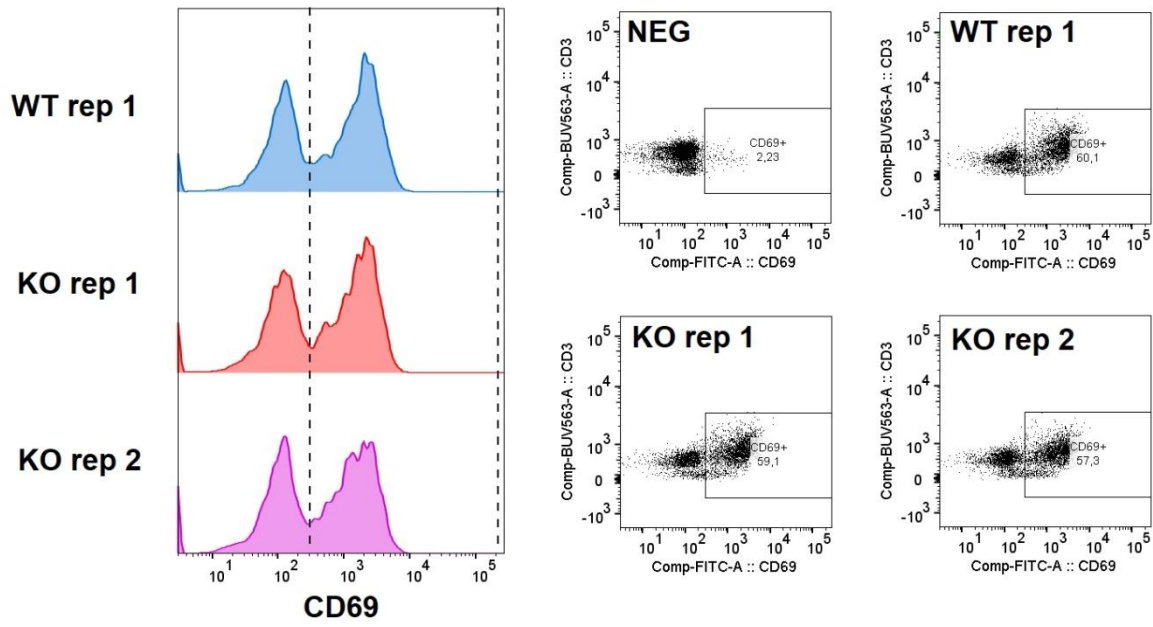

**Karpas422**

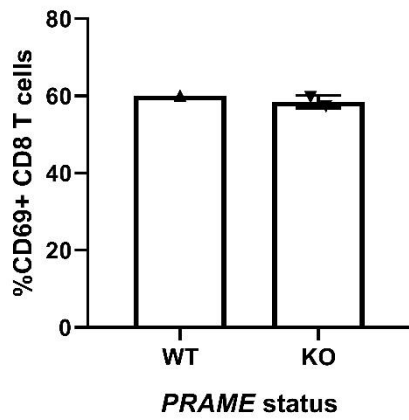

C

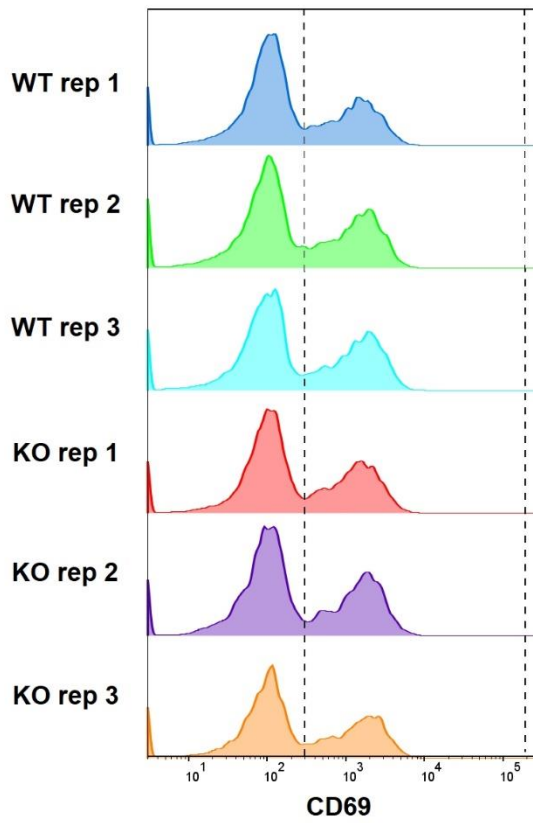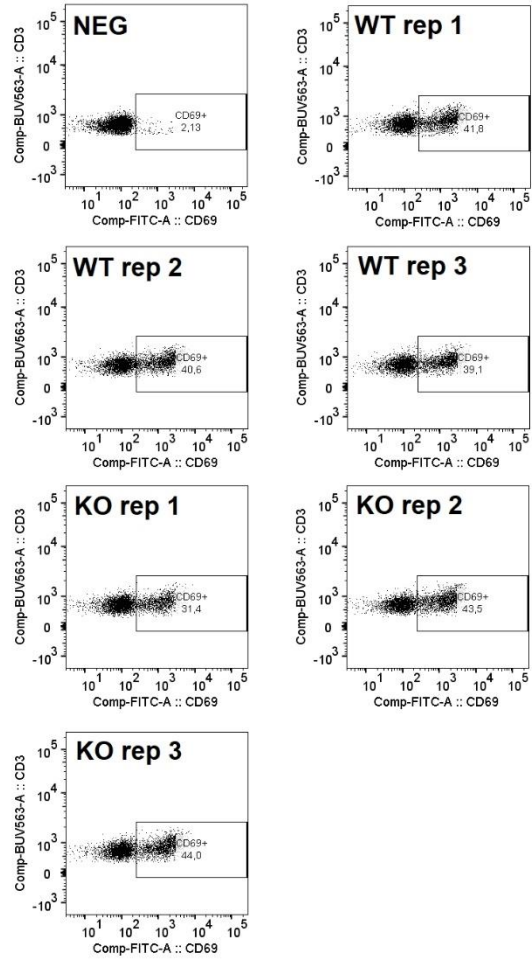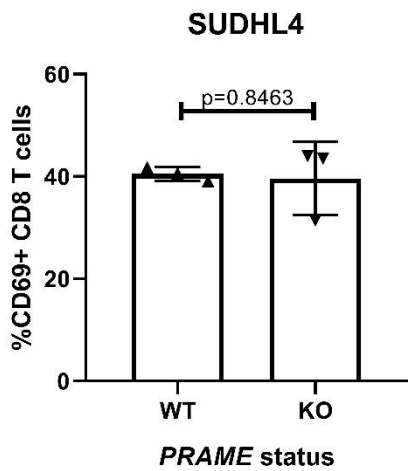

D

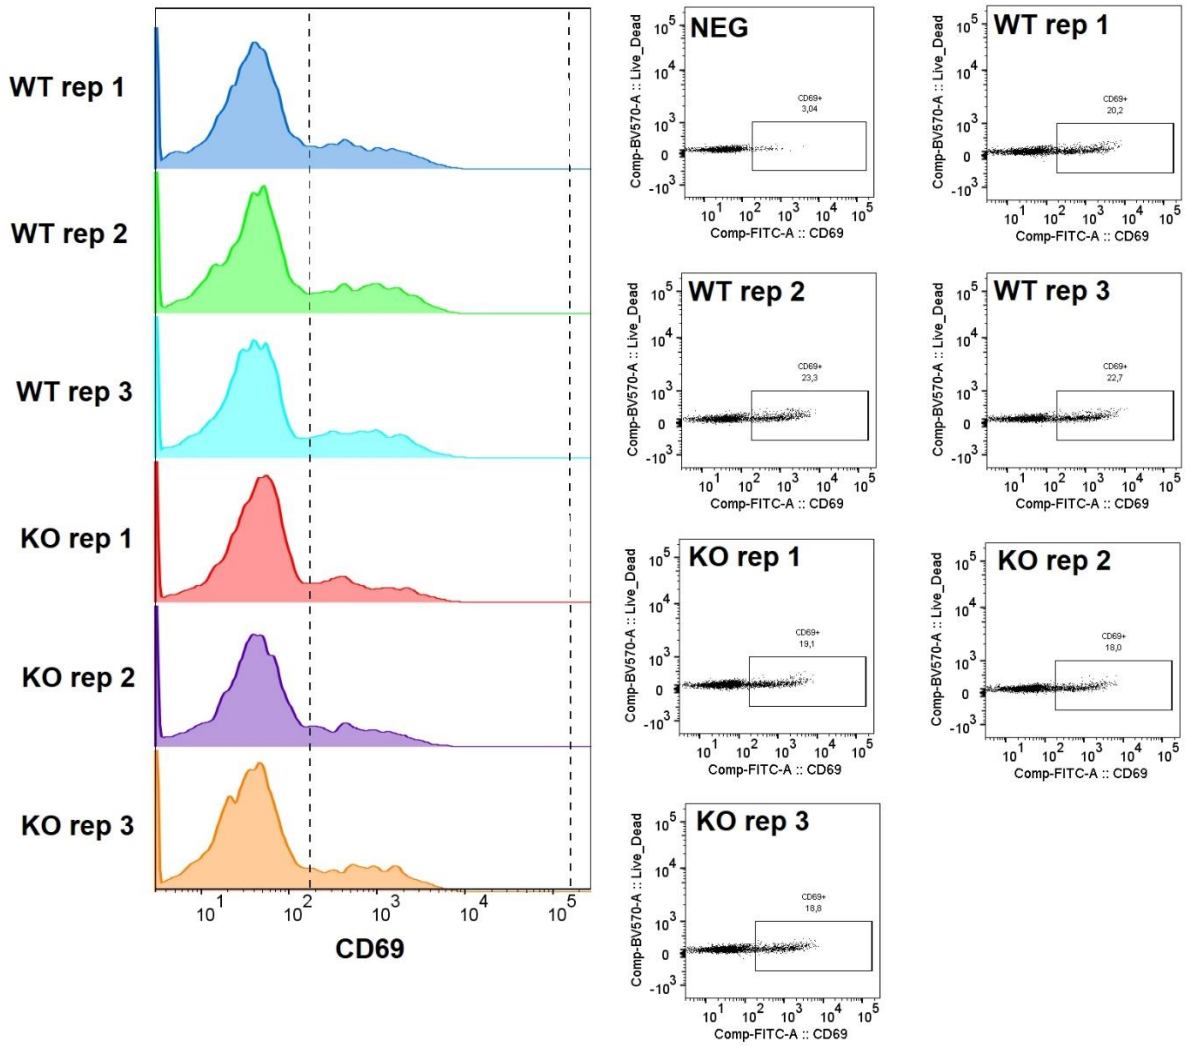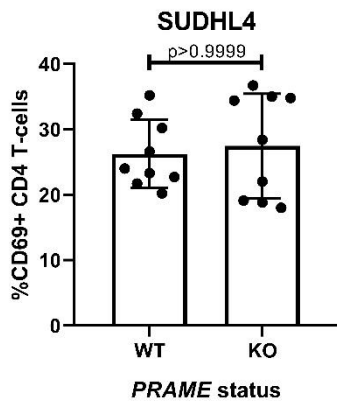

**Figure S6. Co-culture analysis on SU-DHL-4 and HBL-1 cells**

- (A) CD69+ CD8 T-cell populations (upper: FACS plot, lower left: bar-graph for CD69+ population, lower right: CD69+ CTV population) for co-cultured with HBL-1 PRAME isogenic cell lines.
- (B) CD69+ CD8 T-cell populations (upper: FACS plot, lower: bar-graph) for co-cultured with Karpas-422 PRAME isogenic cell lines.
- (C) CD69+ CD8 T-cell populations (upper: FACS plot, lower: bar-graph) for co-cultured with SU-DHL-4 PRAME isogenic cell lines.
- (D) CD69+ CD4 T-cell populations (upper: FACS plot, lower: bar-graph) for co-cultured with SU-DHL-4 PRAME isogenic cell lines.

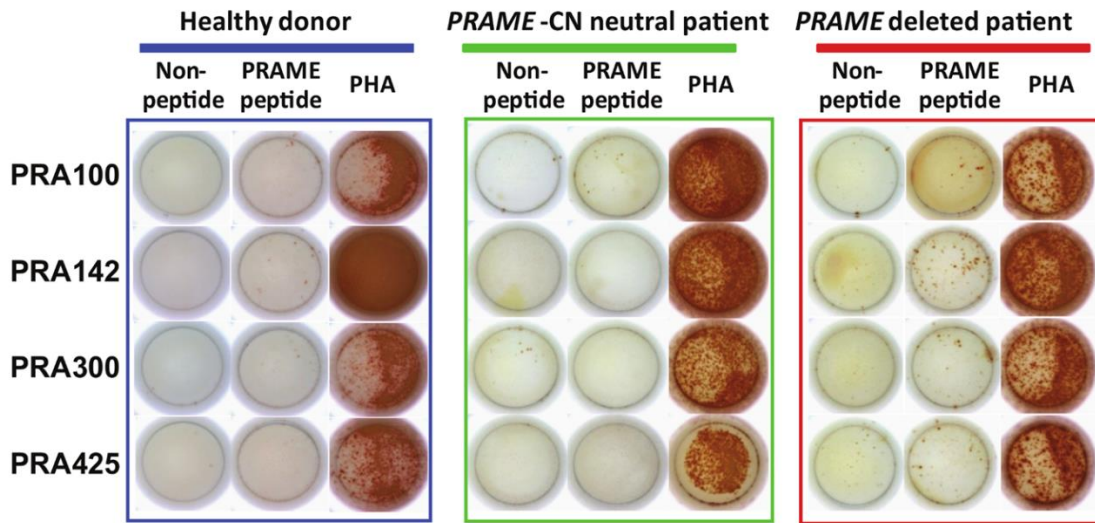

Figure. S7. Representative IFN  $\gamma$  ELISPOT assay results of healthy donor, *PRAME* CN-neutral, and *PRAME* deleted patient derived T-cells.



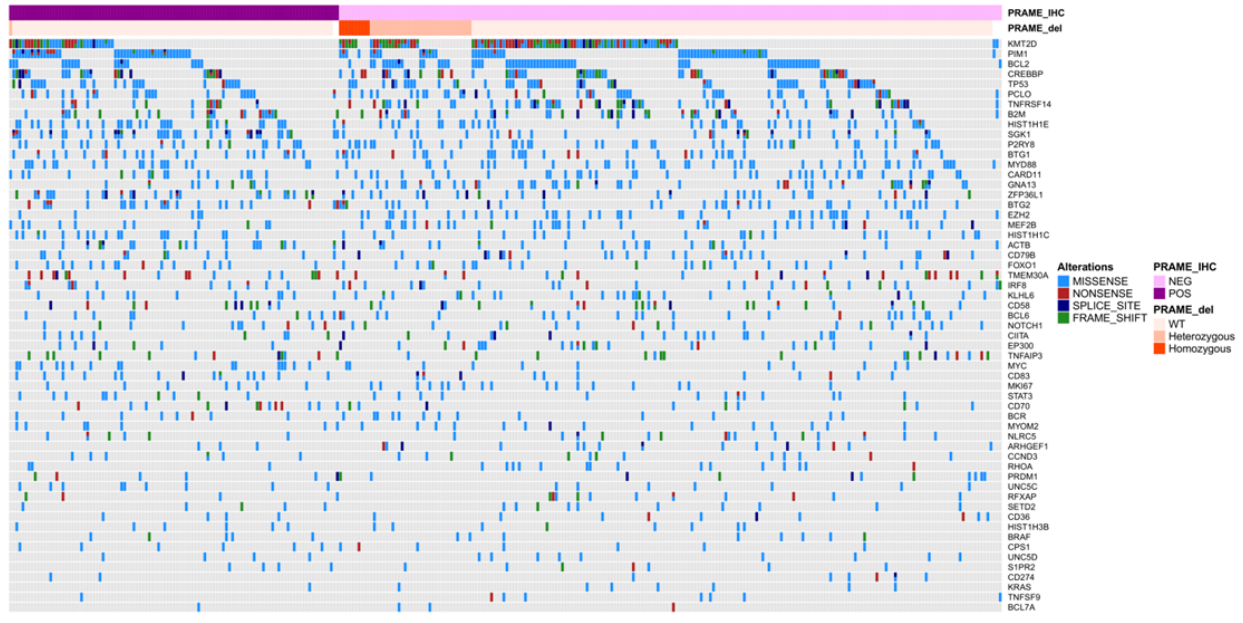

**Figure.S8. Mutation oncoprint between PRAME IHC-negative and IHC-positive samples.**

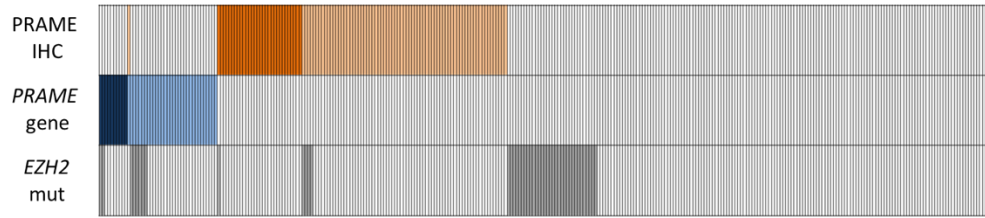

EZH2mut vs PRAME IHC

$P = 0.0009$  (correlation value 0.185) Pearson's correlation test

|                     |           |        |    |
|---------------------|-----------|--------|----|
|                     | PRAME IHC |        |    |
|                     | 2+        | 1+     | 0  |
| PRAME gene deletion | Homo      | Hetero | No |
| EZH2 mutation       | +         | -      |    |

|          | PRAME-CN-neutral | PRAME-deleted |
|----------|------------------|---------------|
| EZH2-mut | 37               | 8             |
| EZH2-wt  | 257              | 36            |

Fisher exact test:  $P = 0.3398$

**Figure S9. Correlation among PRAME-IHC status, PRAME-CN, and EZH2-mutation.**

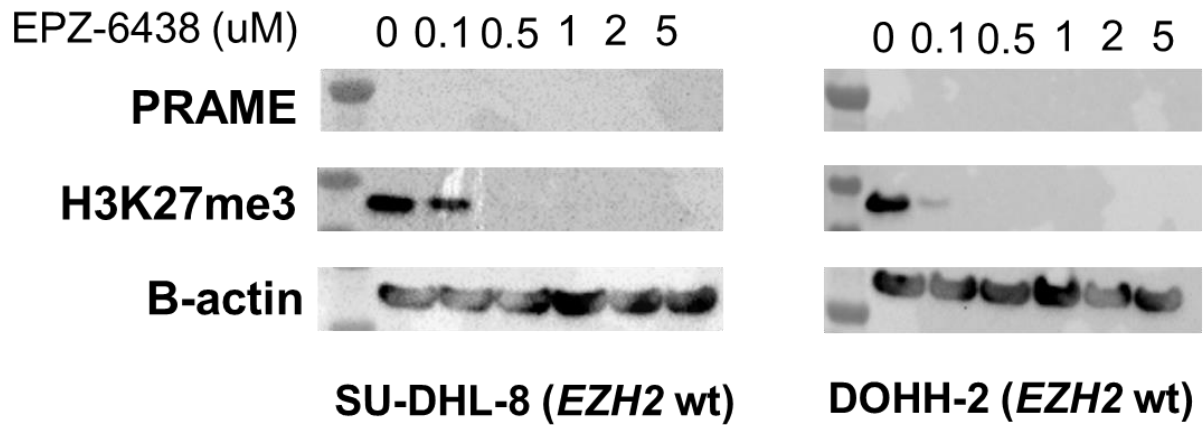

**Figure. S10. Immunoblot for EPZ-6438 treated cells (*EZH2* wt).**  
**Protein lysate (anti-PRAME and anti-H3K27me3: 20µg, anti-B-actin: 20µg) was loaded in the separate gels and transferred to separate membranes).**

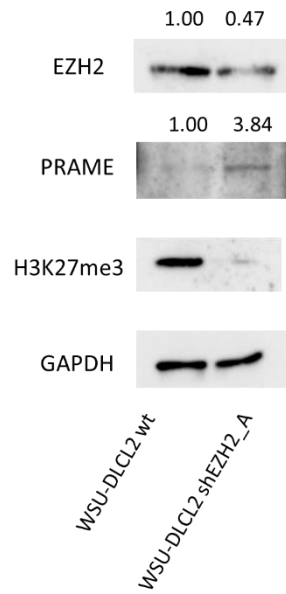

**Figure. S11. EZH2, PRAME, H3K27me3 and GAPDH Immunoblot for EZH2 knock-down by shEZH2 system. Protein lysate (anti-EZH2, anti-PRAME, anti-H3K27me3: 20 $\mu$ g, anti-GAPDH: 5 $\mu$ g) was loaded in the separate gels and transferred to separate membranes. Detecting anti-PRAME membrane was visualized using high-sensitivity chemiluminescent reagent.**

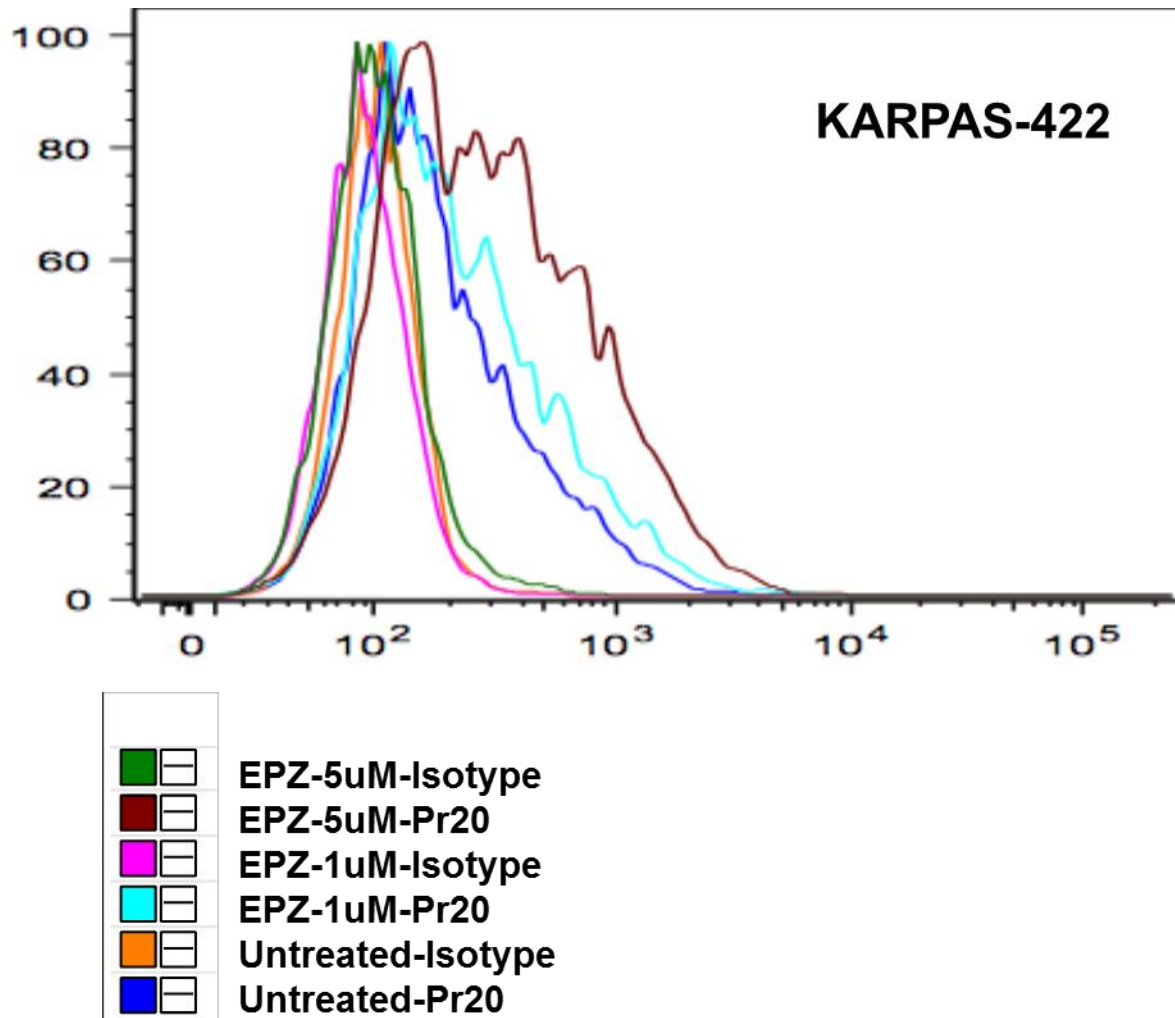

**Figure.S12. Pr20 binding assay in DLBCL cell line.**

Karpas-422 cell line was treated with EPZ-6438 at concentrations of 1uM and 5uM, for 4 days. The cells were harvested, washed and stained with Pr20 mAb or its isotype control hlgG1 conjugated to APC, at a concentration of 3 ug/ml. Data show one of two separate experiments. Both experiments showed binding of Pr20 to the cells, which was enhanced dose-dependently by treating cells with EPZ.

Karpas422  
SU-DHL-4

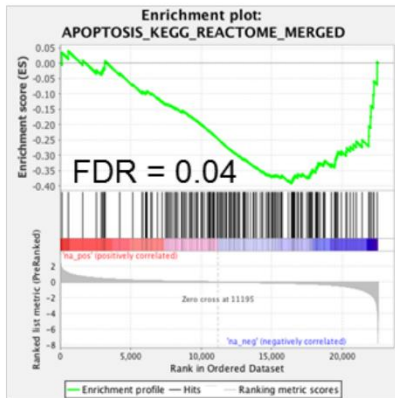

**Figure. S13. Pre-ranked GSEA enrichment plots of apoptosis pathway genes in *PRAME* wt versus *PRAME* KO cell lines.**

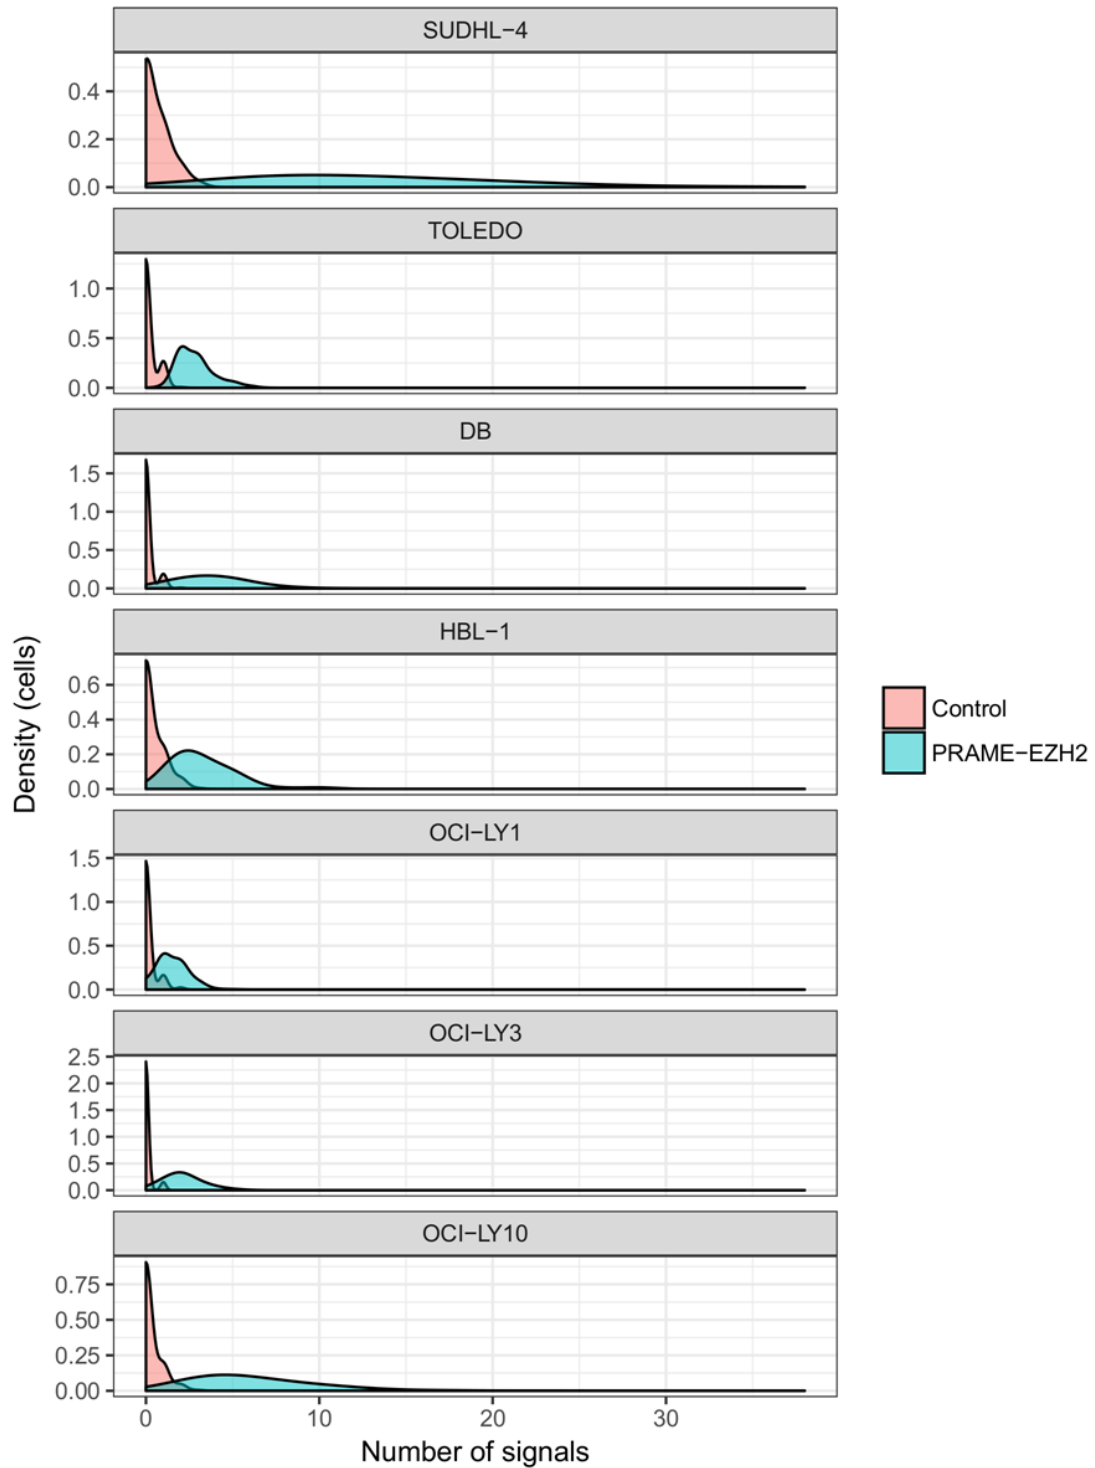

**Figure.S14. PRAME-EZH2 PLA results in each cell line.** Red peak shows control analysis (PRAME antibody/EZH2 antibody only) and blue peak shows EZH2-PRAME combined antibodies.

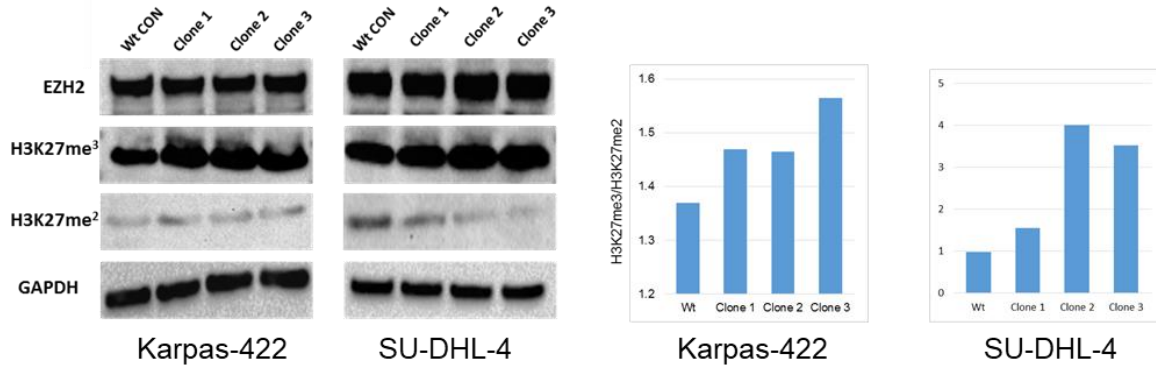

**Figure.S15. EZH2/PRC2 activity change in PRAME isogenic KO cell lines.** Immunoblotting of EZH2, H3K27me3, H3K27me2 in Karpas-422 and SU-DHL-4 isogenic PRAME KO cell lines (left). Densitometry of H3K27me3/H3K27me2 (right). Protein lysate (anti-EZH2, anti-H3K27me3, anti-H3K27me2: 20 $\mu$ g, anti-GAPDH: 5 $\mu$ g) was loaded into separate gels and transferred to separate membranes).
